# Supplementary material for: Using routinely collected hospital data to investigate healthcare worker mobility and patient contacts within a UK hospital during the COVID-19 pandemic
Source: bioRxiv or medRxiv preprint supplement (doi:10.1101/2022.06.10.22276247), 2022-06-14
Supplement: Supplementary file [file media-1.pdf]

## Supplementary material

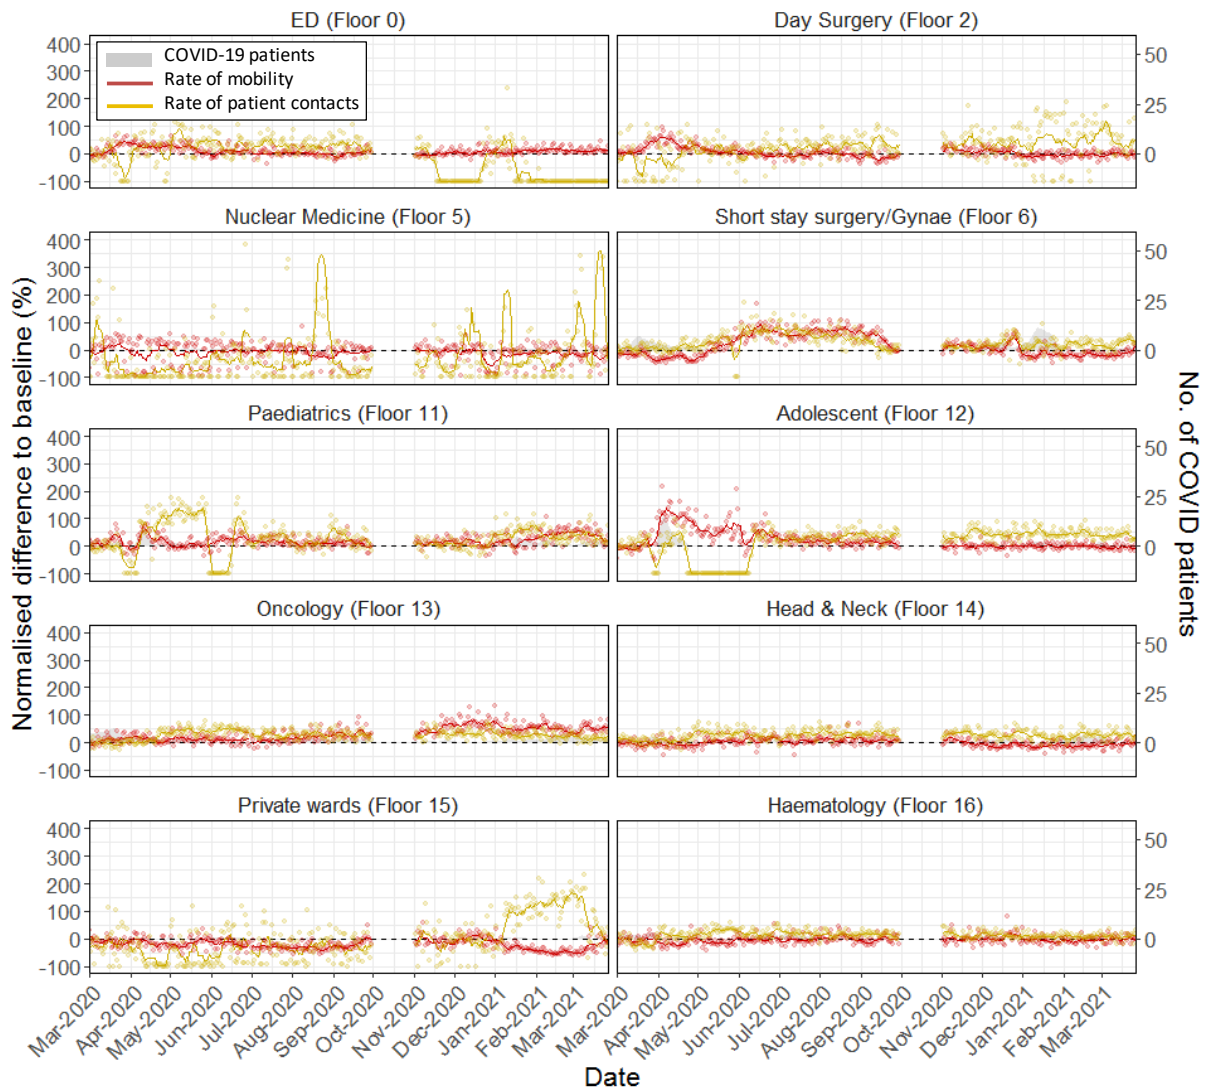

2 Figure S1. Changes in the rate of healthcare worker mobility and patient contact on non COVID-19 wards in  
 3 the Tower building at University College London Hospital. The rate of healthcare worker mobility was  
 4 measured in terms of the daily number of door events per healthcare worker, and the rate of patient contact  
 5 was measured in terms of the daily number of logged patient contacts per patient. Non COVID-19 wards were  
 6 identified as those that had  $\leq 15\%$  of all COVID-19 patients (grey polygon) during the observation period. For  
 7 each of the two measures, the normalized difference ( $N$ ) to the average daily rates during the pre-pandemic  
 8 (red/yellow points, representing percentage change) was calculated, and a smooth was applied using a seven  
 9 day rolling average (red/yellow line). The black dotted line represents 0% change compared to the average in  
 10 the pre-pandemic period. Data for October 2020 was not available.
